# Supplementary material
Source: PubMed Central journal article supplement (PMC4836998)

**File:** RelQ\_RAW\_CTGF\_OA\_IL6\_IL11\_allCellLines\_9.19.13.sdm  
**Print Date:** Thursday, September 19, 2013 17:51:27  
**User:** INSTR-ADMIN  
**Document Type:** Relative Quantification Study

**Document Information**

**Operator:** INSTR-ADMIN  
**Last Modified:** Thursday, September 19, 2013 17:51:21  
**Instrument Type:** Applied Biosystems 7500 Real-Time PCR System

**Plate List**

| Plate Name                            | Last Modified         |
|---------------------------------------|-----------------------|
| CTGF_OA_IL6_IL11_allCellLines_9.19.13 | Sep 19, 2013 05:22 PM |

**Sample Summary**

| Color | Sample   | Detector   | Task   | Avg Ct | Avg dCt | dCt std err | ddCt | RQ | RQ Min | RQ Max | Outliers Removed |
|-------|----------|------------|--------|--------|---------|-------------|------|----|--------|--------|------------------|
| Green | OKF6     | beta-Actin | ENDO   | 17.301 |         |             |      |    |        |        | 0                |
| Red   | UMSCC14a | beta-Actin | ENDO   | 17.647 |         |             |      |    |        |        | 0                |
| Blue  | SCC15    | beta-Actin | ENDO   | 16.118 |         |             |      |    |        |        | 0                |
| Green | UMSCC49  | beta-Actin | ENDO   | 17.055 |         |             |      |    |        |        | 0                |
| Blue  | UMSCC69  | beta-Actin | ENDO   | 19.224 |         |             |      |    |        |        | 0                |
| Red   | NC       | beta-Actin | ENDO   | 35.243 |         |             |      |    |        |        | 0                |
| Green | OKF6     | CTGF, Hum  | Target | 25.265 | 7.964   | 0.092       |      |    |        |        | 0                |
| Red   | UMSCC14a | CTGF, Hum  | Target | 26.713 | 9.066   | 0.036       |      |    |        |        | 0                |
| Blue  | SCC15    | CTGF, Hum  | Target | 26.268 | 10.150  | 0.053       |      |    |        |        | 0                |
| Green | UMSCC49  | CTGF, Hum  | Target | 22.089 | 5.035   | 0.215       |      |    |        |        | 0                |
| Blue  | UMSCC69  | CTGF, Hum  | Target | 24.988 | 5.764   | 0.113       |      |    |        |        | 0                |
| Red   | NC       | CTGF, Hum  | Target |        |         |             |      |    |        |        | 0                |
| Green | OKF6     | IL-11      | Target | 33.876 | 16.576  | 0.230       |      |    |        |        | 0                |
| Red   | UMSCC14a | IL-11      | Target | 30.625 | 12.978  | 0.022       |      |    |        |        | 1                |
| Blue  | SCC15    | IL-11      | Target | 29.713 | 13.595  | 0.071       |      |    |        |        | 0                |
| Green | UMSCC49  | IL-11      | Target | 34.461 | 17.406  | 0.215       |      |    |        |        | 1                |
| Blue  | UMSCC69  | IL-11      | Target | 32.625 | 13.401  | 0.458       |      |    |        |        | 0                |

|          |       |        |        |        |       |  |   |
|----------|-------|--------|--------|--------|-------|--|---|
| NC       | IL-11 | Target |        |        |       |  | 0 |
| OKF6     | IL-6  | Target | 30.396 | 13.096 | 0.059 |  | 0 |
| UMSCC14a | IL-6  | Target | 26.660 | 9.013  | 0.044 |  | 0 |
| SCC15    | IL-6  | Target | 25.996 | 9.878  | 0.153 |  | 0 |
| UMSCC49  | IL-6  | Target | 26.214 | 9.159  | 0.282 |  | 0 |
| UMSCC69  | IL-6  | Target | 30.194 | 10.970 | 0.080 |  | 0 |
| NC       | IL-6  | Target |        |        |       |  | 0 |
| OKF6     | OA    | Target | 26.945 | 9.644  | 0.057 |  | 0 |
| UMSCC14a | OA    | Target | 26.131 | 8.483  | 0.034 |  | 0 |
| SCC15    | OA    | Target | 23.019 | 6.902  | 0.052 |  | 0 |
| UMSCC49  | OA    | Target | 23.086 | 6.032  | 0.214 |  | 0 |
| UMSCC69  | OA    | Target | 26.500 | 7.276  | 0.086 |  | 0 |
| NC       | OA    | Target |        |        |       |  | 0 |

### Well Information

| Plate            | Well | Sample   | Detector   | Ct     | Ct<br>std err | Omit | Filtered | Threshold | Auto<br>Ct | Baseline | Start-<br>End |
|------------------|------|----------|------------|--------|---------------|------|----------|-----------|------------|----------|---------------|
| CTGF_OA_IL6_I... | G1   | OKF6     | beta-Actin | 17.327 | 0.054         |      |          | 0.200000  | Manual     | Manual   | [3,15]        |
| CTGF_OA_IL6_I... | G2   | OKF6     | beta-Actin | 17.197 | 0.054         |      |          | 0.200000  | Manual     | Manual   | [3,15]        |
| CTGF_OA_IL6_I... | G3   | OKF6     | beta-Actin | 17.378 | 0.054         |      |          | 0.200000  | Manual     | Manual   | [3,15]        |
| CTGF_OA_IL6_I... | G4   | UMSCC14a | beta-Actin | 17.643 | 0.019         |      |          | 0.200000  | Manual     | Manual   | [3,15]        |
| CTGF_OA_IL6_I... | G5   | UMSCC14a | beta-Actin | 17.616 | 0.019         |      |          | 0.200000  | Manual     | Manual   | [3,15]        |
| CTGF_OA_IL6_I... | G6   | UMSCC14a | beta-Actin | 17.683 | 0.019         |      |          | 0.200000  | Manual     | Manual   | [3,15]        |
| CTGF_OA_IL6_I... | G7   | SCC15    | beta-Actin | 16.057 | 0.044         |      |          | 0.200000  | Manual     | Manual   | [3,15]        |
| CTGF_OA_IL6_I... | G8   | SCC15    | beta-Actin | 16.094 | 0.044         |      |          | 0.200000  | Manual     | Manual   | [3,15]        |
| CTGF_OA_IL6_I... | G9   | SCC15    | beta-Actin | 16.202 | 0.044         |      |          | 0.200000  | Manual     | Manual   | [3,15]        |
| CTGF_OA_IL6_I... | G10  | UMSCC49  | beta-Actin | 16.776 | 0.214         |      |          | 0.200000  | Manual     | Manual   | [3,15]        |
| CTGF_OA_IL6_I... | G11  | UMSCC49  | beta-Actin | 16.912 | 0.214         |      |          | 0.200000  | Manual     | Manual   | [3,15]        |
| CTGF_OA_IL6_I... | G12  | UMSCC49  | beta-Actin | 17.476 | 0.214         |      |          | 0.200000  | Manual     | Manual   | [3,15]        |
| CTGF_OA_IL6_I... | H1   | UMSCC69  | beta-Actin | 19.206 | 0.072         |      |          | 0.200000  | Manual     | Manual   | [3,15]        |
| CTGF_OA_IL6_I... | H2   | UMSCC69  | beta-Actin | 19.110 | 0.072         |      |          | 0.200000  | Manual     | Manual   | [3,15]        |
| CTGF_OA_IL6_I... | H3   | UMSCC69  | beta-Actin | 19.356 | 0.072         |      |          | 0.200000  | Manual     | Manual   | [3,15]        |
| CTGF_OA_IL6_I... | H4   | NC       | beta-Actin | Undet. |               |      |          | 0.200000  | Manual     | Manual   | [3,15]        |
| CTGF_OA_IL6_I... | H5   | NC       | beta-Actin | Undet. |               |      |          | 0.200000  | Manual     | Manual   | [3,15]        |
| CTGF_OA_IL6_I... | H6   | NC       | beta-Actin | 35.243 |               |      |          | 0.200000  | Manual     | Manual   | [3,15]        |
| CTGF_OA_IL6_I... | A1   | OKF6     | CTGF, Hum  | 25.380 | 0.074         |      |          | 0.200000  | Manual     | Manual   | [3,15]        |
| CTGF_OA_IL6_I... | A2   | OKF6     | CTGF, Hum  | 25.289 | 0.074         |      |          | 0.200000  | Manual     | Manual   | [3,15]        |
| CTGF_OA_IL6_I... | A3   | OKF6     | CTGF, Hum  | 25.126 | 0.074         |      |          | 0.200000  | Manual     | Manual   | [3,15]        |
| CTGF_OA_IL6_I... | A4   | UMSCC14a | CTGF, Hum  | 26.707 | 0.030         |      |          | 0.200000  | Manual     | Manual   | [3,15]        |

|                  |     |          |           |        |       |         |          |        |        |        |
|------------------|-----|----------|-----------|--------|-------|---------|----------|--------|--------|--------|
| CTGF_OA_IL6_I... | A5  | UMSCC14a | CTGF, Hum | 26.769 | 0.030 |         | 0.200000 | Manual | Manual | [3,15] |
| CTGF_OA_IL6_I... | A6  | UMSCC14a | CTGF, Hum | 26.664 | 0.030 |         | 0.200000 | Manual | Manual | [3,15] |
| CTGF_OA_IL6_I... | A7  | SCC15    | CTGF, Hum | 26.242 | 0.030 |         | 0.200000 | Manual | Manual | [3,15] |
| CTGF_OA_IL6_I... | A8  | SCC15    | CTGF, Hum | 26.327 | 0.030 |         | 0.200000 | Manual | Manual | [3,15] |
| CTGF_OA_IL6_I... | A9  | SCC15    | CTGF, Hum | 26.234 | 0.030 |         | 0.200000 | Manual | Manual | [3,15] |
| CTGF_OA_IL6_I... | A10 | UMSCC49  | CTGF, Hum | 22.081 | 0.011 |         | 0.200000 | Manual | Manual | [3,15] |
| CTGF_OA_IL6_I... | A11 | UMSCC49  | CTGF, Hum | 22.076 | 0.011 |         | 0.200000 | Manual | Manual | [3,15] |
| CTGF_OA_IL6_I... | A12 | UMSCC49  | CTGF, Hum | 22.112 | 0.011 |         | 0.200000 | Manual | Manual | [3,15] |
| CTGF_OA_IL6_I... | B1  | UMSCC69  | CTGF, Hum | 25.122 | 0.087 |         | 0.200000 | Manual | Manual | [3,15] |
| CTGF_OA_IL6_I... | B2  | UMSCC69  | CTGF, Hum | 25.018 | 0.087 |         | 0.200000 | Manual | Manual | [3,15] |
| CTGF_OA_IL6_I... | B3  | UMSCC69  | CTGF, Hum | 24.825 | 0.087 |         | 0.200000 | Manual | Manual | [3,15] |
| CTGF_OA_IL6_I... | B4  | NC       | CTGF, Hum | Undet. |       |         | 0.200000 | Manual | Manual | [3,15] |
| CTGF_OA_IL6_I... | B5  | NC       | CTGF, Hum | Undet. |       |         | 0.200000 | Manual | Manual | [3,15] |
| CTGF_OA_IL6_I... | B6  | NC       | CTGF, Hum | Undet. |       |         | 0.200000 | Manual | Manual | [3,15] |
| CTGF_OA_IL6_I... | E7  | OKF6     | IL-11     | 33.718 | 0.223 |         | 0.200000 | Manual | Manual | [3,15] |
| CTGF_OA_IL6_I... | E8  | OKF6     | IL-11     | 33.594 | 0.223 |         | 0.200000 | Manual | Manual | [3,15] |
| CTGF_OA_IL6_I... | E9  | OKF6     | IL-11     | 34.317 | 0.223 |         | 0.200000 | Manual | Manual | [3,15] |
| CTGF_OA_IL6_I... | E10 | UMSCC14a | IL-11     | 30.615 | 0.010 |         | 0.200000 | Manual | Manual | [3,15] |
| CTGF_OA_IL6_I... | E11 | UMSCC14a | IL-11     | 30.636 | 0.010 |         | 0.200000 | Manual | Manual | [3,15] |
| CTGF_OA_IL6_I... | E12 | UMSCC14a | IL-11     | 31.584 | 0.010 | Outlier | 0.200000 | Manual | Manual | [3,15] |
| CTGF_OA_IL6_I... | F1  | SCC15    | IL-11     | 29.601 | 0.057 |         | 0.200000 | Manual | Manual | [3,15] |
| CTGF_OA_IL6_I... | F2  | SCC15    | IL-11     | 29.755 | 0.057 |         | 0.200000 | Manual | Manual | [3,15] |
| CTGF_OA_IL6_I... | F3  | SCC15    | IL-11     | 29.783 | 0.057 |         | 0.200000 | Manual | Manual | [3,15] |
| CTGF_OA_IL6_I... | F4  | UMSCC49  | IL-11     | 34.448 | 0.012 |         | 0.200000 | Manual | Manual | [3,15] |
| CTGF_OA_IL6_I... | F5  | UMSCC49  | IL-11     | 34.473 | 0.012 |         | 0.200000 | Manual | Manual | [3,15] |
| CTGF_OA_IL6_I... | F6  | UMSCC49  | IL-11     | 36.044 | 0.012 | Outlier | 0.200000 | Manual | Manual | [3,15] |
| CTGF_OA_IL6_I... | F7  | UMSCC69  | IL-11     | 32.120 | 0.452 |         | 0.200000 | Manual | Manual | [3,15] |
| CTGF_OA_IL6_I... | F8  | UMSCC69  | IL-11     | 32.228 | 0.452 |         | 0.200000 | Manual | Manual | [3,15] |
| CTGF_OA_IL6_I... | F9  | UMSCC69  | IL-11     | 33.528 | 0.452 |         | 0.200000 | Manual | Manual | [3,15] |
| CTGF_OA_IL6_I... | F10 | NC       | IL-11     | Undet. |       |         | 0.200000 | Manual | Manual | [3,15] |
| CTGF_OA_IL6_I... | F11 | NC       | IL-11     | Undet. |       |         | 0.200000 | Manual | Manual | [3,15] |
| CTGF_OA_IL6_I... | F12 | NC       | IL-11     | Undet. |       |         | 0.200000 | Manual | Manual | [3,15] |
| CTGF_OA_IL6_I... | D1  | OKF6     | IL-6      | 30.437 | 0.024 |         | 0.200000 | Manual | Manual | [3,15] |
| CTGF_OA_IL6_I... | D2  | OKF6     | IL-6      | 30.353 | 0.024 |         | 0.200000 | Manual | Manual | [3,15] |
| CTGF_OA_IL6_I... | D3  | OKF6     | IL-6      | 30.399 | 0.024 |         | 0.200000 | Manual | Manual | [3,15] |
| CTGF_OA_IL6_I... | D4  | UMSCC14a | IL-6      | 26.610 | 0.039 |         | 0.200000 | Manual | Manual | [3,15] |
| CTGF_OA_IL6_I... | D5  | UMSCC14a | IL-6      | 26.634 | 0.039 |         | 0.200000 | Manual | Manual | [3,15] |
| CTGF_OA_IL6_I... | D6  | UMSCC14a | IL-6      | 26.737 | 0.039 |         | 0.200000 | Manual | Manual | [3,15] |
| CTGF_OA_IL6_I... | D7  | SCC15    | IL-6      | 25.804 | 0.147 |         | 0.200000 | Manual | Manual | [3,15] |
| CTGF_OA_IL6_I... | D8  | SCC15    | IL-6      | 25.900 | 0.147 |         | 0.200000 | Manual | Manual | [3,15] |
| CTGF_OA_IL6_I... | D9  | SCC15    | IL-6      | 26.284 | 0.147 |         | 0.200000 | Manual | Manual | [3,15] |
| CTGF_OA_IL6_I... | D10 | UMSCC49  | IL-6      | 25.923 | 0.183 |         | 0.200000 | Manual | Manual | [3,15] |
| CTGF_OA_IL6_I... | D11 | UMSCC49  | IL-6      | 26.166 | 0.183 |         | 0.200000 | Manual | Manual | [3,15] |

|                  |     |          |      |        |       |          |        |        |        |
|------------------|-----|----------|------|--------|-------|----------|--------|--------|--------|
| CTGF_OA_IL6_I... | D12 | UMSCC49  | IL-6 | 26.553 | 0.183 | 0.200000 | Manual | Manual | [3,15] |
| CTGF_OA_IL6_I... | E1  | UMSCC69  | IL-6 | 30.244 | 0.035 | 0.200000 | Manual | Manual | [3,15] |
| CTGF_OA_IL6_I... | E2  | UMSCC69  | IL-6 | 30.127 | 0.035 | 0.200000 | Manual | Manual | [3,15] |
| CTGF_OA_IL6_I... | E3  | UMSCC69  | IL-6 | 30.212 | 0.035 | 0.200000 | Manual | Manual | [3,15] |
| CTGF_OA_IL6_I... | E4  | NC       | IL-6 | Undet. |       | 0.200000 | Manual | Manual | [3,15] |
| CTGF_OA_IL6_I... | E5  | NC       | IL-6 | Undet. |       | 0.200000 | Manual | Manual | [3,15] |
| CTGF_OA_IL6_I... | E6  | NC       | IL-6 | Undet. |       | 0.200000 | Manual | Manual | [3,15] |
| CTGF_OA_IL6_I... | B7  | OKF6     | OA   | 26.976 | 0.020 | 0.200000 | Manual | Manual | [3,15] |
| CTGF_OA_IL6_I... | B8  | OKF6     | OA   | 26.907 | 0.020 | 0.200000 | Manual | Manual | [3,15] |
| CTGF_OA_IL6_I... | B9  | OKF6     | OA   | 26.952 | 0.020 | 0.200000 | Manual | Manual | [3,15] |
| CTGF_OA_IL6_I... | B10 | UMSCC14a | OA   | 26.113 | 0.028 | 0.200000 | Manual | Manual | [3,15] |
| CTGF_OA_IL6_I... | B11 | UMSCC14a | OA   | 26.093 | 0.028 | 0.200000 | Manual | Manual | [3,15] |
| CTGF_OA_IL6_I... | B12 | UMSCC14a | OA   | 26.186 | 0.028 | 0.200000 | Manual | Manual | [3,15] |
| CTGF_OA_IL6_I... | C1  | SCC15    | OA   | 23.048 | 0.028 | 0.200000 | Manual | Manual | [3,15] |
| CTGF_OA_IL6_I... | C2  | SCC15    | OA   | 23.048 | 0.028 | 0.200000 | Manual | Manual | [3,15] |
| CTGF_OA_IL6_I... | C3  | SCC15    | OA   | 22.962 | 0.028 | 0.200000 | Manual | Manual | [3,15] |
| CTGF_OA_IL6_I... | C4  | UMSCC49  | OA   | 23.094 | 0.006 | 0.200000 | Manual | Manual | [3,15] |
| CTGF_OA_IL6_I... | C5  | UMSCC49  | OA   | 23.091 | 0.006 | 0.200000 | Manual | Manual | [3,15] |
| CTGF_OA_IL6_I... | C6  | UMSCC49  | OA   | 23.074 | 0.006 | 0.200000 | Manual | Manual | [3,15] |
| CTGF_OA_IL6_I... | C7  | UMSCC69  | OA   | 26.417 | 0.047 | 0.200000 | Manual | Manual | [3,15] |
| CTGF_OA_IL6_I... | C8  | UMSCC69  | OA   | 26.581 | 0.047 | 0.200000 | Manual | Manual | [3,15] |
| CTGF_OA_IL6_I... | C9  | UMSCC69  | OA   | 26.502 | 0.047 | 0.200000 | Manual | Manual | [3,15] |
| CTGF_OA_IL6_I... | C10 | NC       | OA   | Undet. |       | 0.200000 | Manual | Manual | [3,15] |
| CTGF_OA_IL6_I... | C11 | NC       | OA   | Undet. |       | 0.200000 | Manual | Manual | [3,15] |
| CTGF_OA_IL6_I... | C12 | NC       | OA   | Undet. |       | 0.200000 | Manual | Manual | [3,15] |

# Delta Rn vs Cycle

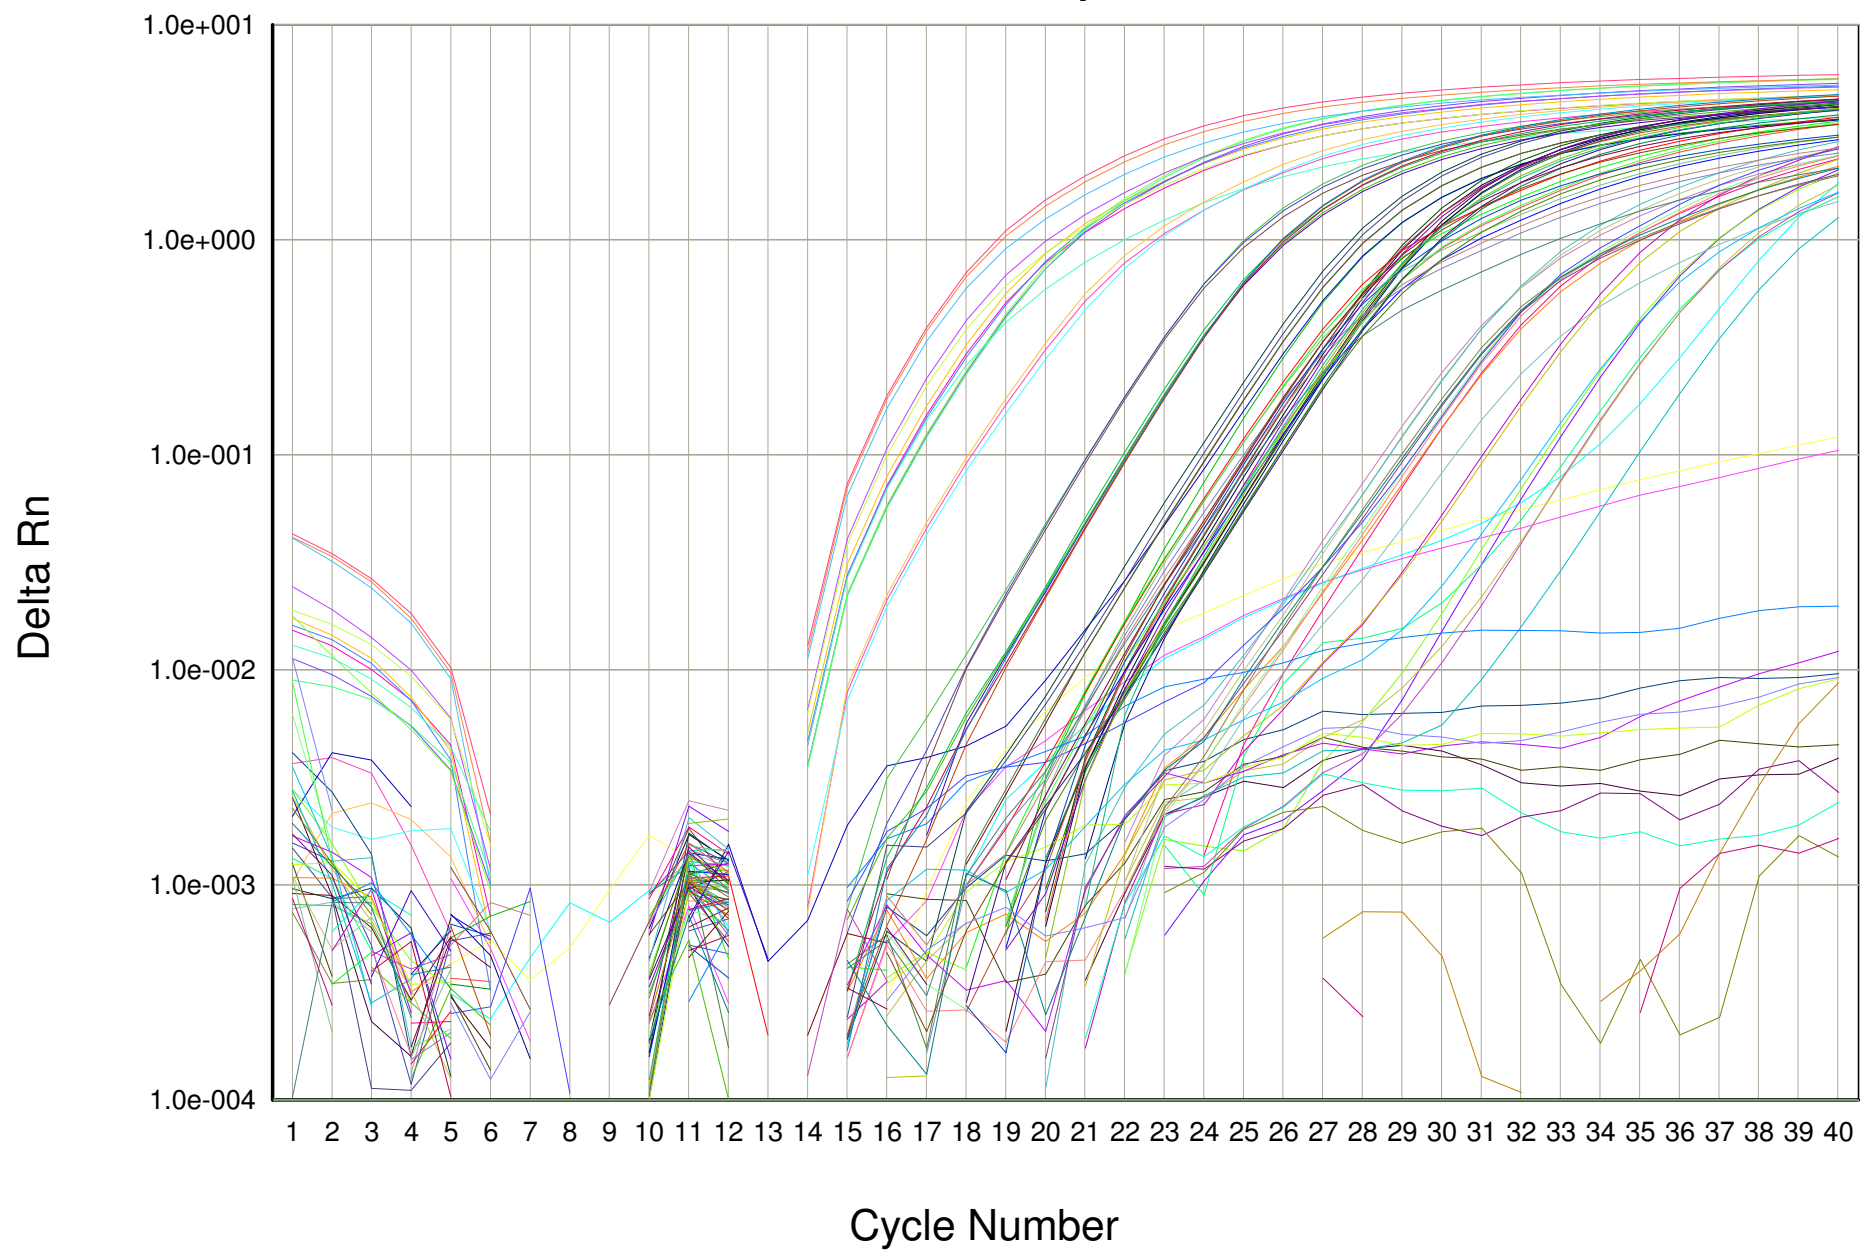

Selected Detector: All

## Gene Expression

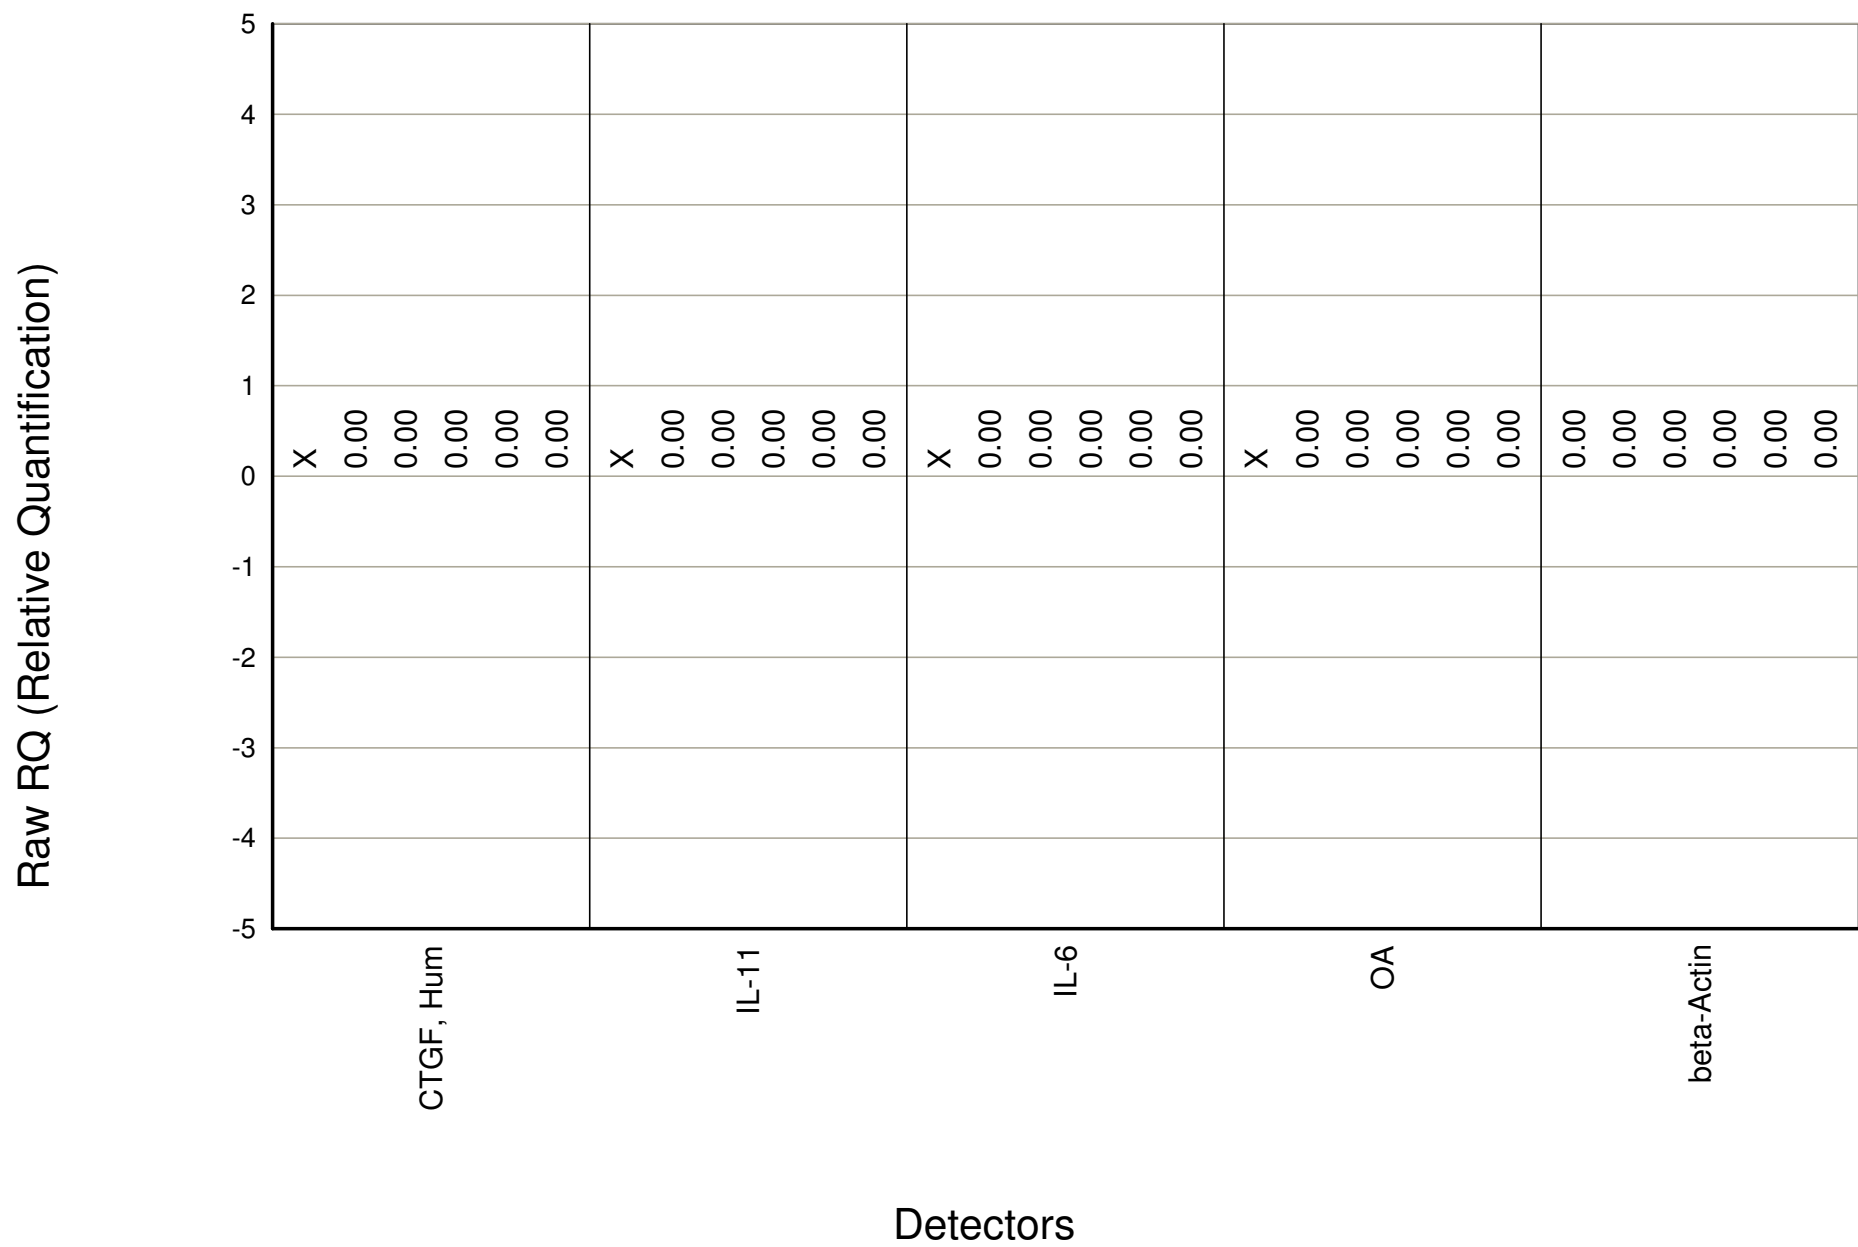

Supplement: NIHMS744462-supplement-RT-PCR.pdf [file NIHMS744462-supplement-RT-PCR.pdf]
